# Supplementary material
Source: PubMed Central journal article supplement (PMC7505204)
Supplement: sbz142_suppl_supplementary_material.pdf [file sbz142_suppl_supplementary_material.pdf]

## Supplementary material

Table 1S: Missing data by country

|            | Age | Sex | Ethnicity | Paternal age | Age at fatherhood | Maternal age | CAPE Positive | CAPE Negative | CAPE Depressive |
|------------|-----|-----|-----------|--------------|-------------------|--------------|---------------|---------------|-----------------|
| UK         | 0   | 0   | 0         | 0            | 11                | 1            | 6             | 6             | 2               |
| Netherland | 0   | 0   | 1         | 0            | 3                 | 0            | 9             | 4             | 5               |
| Spain      | 0   | 0   | 0         | 0            | 5                 | 0            | 21            | 9             | 14              |
| France     | 0   | 0   | 0         | 0            | 0                 | 0            | 16            | 19            | 4               |
| Italy      | 0   | 0   | 0         | 0            | 92                | 1            | 17            | 11            | 10              |
| Brazil     | 0   | 0   | 0         | 0            | 1                 | 4            | 0             | 1             | 3               |
| Total      | 0   | 0   | 1         | 0            | 112               | 6            | 69            | 50            | 38              |

Table 2S: Parental variables and CAPE scores by country

|            | Paternal Age |      | Age at fatherhood |      | Maternal Age |      | CAPE Positive |      | CAPE Negative |      | CAPE Depressive |      | CAPE Total |      |
|------------|--------------|------|-------------------|------|--------------|------|---------------|------|---------------|------|-----------------|------|------------|------|
|            | Mean         | SD   | Mean              | SD   | Mean         | SD   | Mean          | SD   | Mean          | SD   | Mean            | SD   | Mean       | SD   |
| UK         | 32.18        | 6.75 | 28.87             | 6.06 | 28.59        | 5.63 | 4.11          | 2.92 | 6.10          | 3.40 | 4.33            | 1.88 | 14.53      | 6.63 |
| Netherland | 32.18        | 6.18 | 28.59             | 5.77 | 29.43        | 5.44 | 3.57          | 2.68 | 6.52          | 3.47 | 4.34            | 1.99 | 14.44      | 6.72 |
| Spain      | 31.39        | 6.39 | 28.08             | 5.39 | 28.18        | 5.60 | 3.32          | 2.76 | 5.83          | 3.69 | 3.99            | 1.93 | 13.15      | 7.05 |
| France     | 30.79        | 7.63 | 27.89             | 5.73 | 26.76        | 5.56 | 2.99          | 2.47 | 6.69          | 3.71 | 4.66            | 1.86 | 14.35      | 6.67 |
| Italy      | 32.55        | 6.55 | 29.75             | 5.48 | 28.72        | 5.52 | 4.38          | 2.97 | 6.79          | 3.51 | 4.80            | 1.78 | 15.97      | 6.74 |
| Brazil     | 30.95        | 7.74 | 26.13             | 6.02 | 27.13        | 6.47 | 4.17          | 3.09 | 5.30          | 3.71 | 4.05            | 2.10 | 13.52      | 7.59 |

Table 3S: Results of MCAR Little's test

| <b>Little's test (MCAR)</b> | <b>P_value*</b> |
|-----------------------------|-----------------|
| CAPE Positive               | 0.000           |
| CAPE Negative               | 0.137           |
| CAPE Depressive             | 0.913           |
| CAPE Total score            | 0.000           |

\* P\_value < 0.05 → Missing data are not MCAR (missing completely at random)

Table 4S: Tests of overdispersion

| Paternal age* | Dispersion | p     |  | Paternity age* | Dispersion | p     |
|---------------|------------|-------|--|----------------|------------|-------|
| Total         | 3.39       | <0.01 |  | Total          | 3.44       | <0.01 |
| Positive      | 2.09       | <0.01 |  | Positive       | 2.10       | <0.01 |
| Negative      | 2.11       | <0.01 |  | Negative       | 2.13       | <0.01 |
| Depressive    | 0.85       | 0.99  |  | Depressive     | 0.87       | 0.99  |

\* the figures are for models with only one parental variable (results for models that included maternal age as a co-variate are similar)

Table 5S: Tests of variance inflation (VIF) in models using 2 parental variables

| VIF              | <b>Paternal age</b> | Maternal age | Age      | Sex      | Ethnicity |
|------------------|---------------------|--------------|----------|----------|-----------|
| CAPE Positive    | 2.057067            | 2.067058     | 1.009107 | 1.002757 | 1.032231  |
| CAPE Negative    | 2.074154            | 2.091235     | 1.010660 | 1.003060 | 1.034576  |
| CAPE Depressive  | 2.075158            | 2.091141     | 1.011035 | 1.002418 | 1.033731  |
| CAPE Total Score | 2.030487            | 2.044007     | 1.009414 | 1.002330 | 1.030981  |

| VIF              | <b>Paternity age</b> | Maternal age | Age      | Sex      | Ethnicity |
|------------------|----------------------|--------------|----------|----------|-----------|
| CAPE Positive    | 1.160221             | 1.169611     | 1.005382 | 1.002309 | 1.015456  |
| CAPE Negative    | 1.162338             | 1.175108     | 1.006552 | 1.002494 | 1.020090  |
| CAPE Depressive  | 1.170373             | 1.181146     | 1.007136 | 1.002369 | 1.018665  |
| CAPE Total Score | 1.159435             | 1.169082     | 1.005688 | 1.002034 | 1.016884  |

Table 6S: Tests of variance inflation (VIF) in models using only paternal/paternity variables

| VIF              | <b>Paternal age</b> | Age      | Sex      | Ethnicity |
|------------------|---------------------|----------|----------|-----------|
| CAPE Positive    | 1.004440            | 1.005857 | 1.002569 | 1.005041  |
| CAPE Negative    | 1.004782            | 1.007707 | 1.002923 | 1.005927  |
| CAPE Depressive  | 1.003339            | 1.007433 | 1.002408 | 1.006147  |
| CAPE Total Score | 1.003916            | 1.005980 | 1.002159 | 1.004523  |

| VIF              | <b>Paternity age</b> | Age      | Sex      | Ethnicity |
|------------------|----------------------|----------|----------|-----------|
| CAPE Positive    | 1.002327             | 1.005055 | 1.001277 | 1.007687  |
| CAPE Negative    | 1.003260             | 1.006274 | 1.001014 | 1.009805  |
| CAPE Depressive  | 1.002850             | 1.006661 | 1.001475 | 1.009561  |
| CAPE Total Score | 1.003212             | 1.005159 | 1.001061 | 1.008455  |

Table 7S: Summary of the selection procedure for the best suited statistical models

| Test                | Significant Results                                                                                     | Decision *                                        |
|---------------------|---------------------------------------------------------------------------------------------------------|---------------------------------------------------|
| Little's MCAR       | Positive and Total data are not MCAR                                                                    | Impute CAPE missing data                          |
| Overdispersion test | Models for Positive, Negative and Total scores show overdispersion                                      | Use binomial negative models (instead of Poisson) |
| VIF test            | Signs of inflated variance (thus collinearity) in all models using paternal and maternal age conjointly | Use models with only one parental variable        |
| Vuong test          | ZIP model superior to non-ZIP models for the Negative score (inferior for all other scores)             | Use non-ZIP models but for the Negative score     |

\* for all analyses unless otherwise specified
